# Supplementary material
Source: publisher site journal article supplement (https://www.dovepress.com/get_supplementary_file.php?f=484768.docx)
Supplement: Supplementary file 1 [file get_supplementary_file.php]

Supplementary Material

## Supplementary Figures


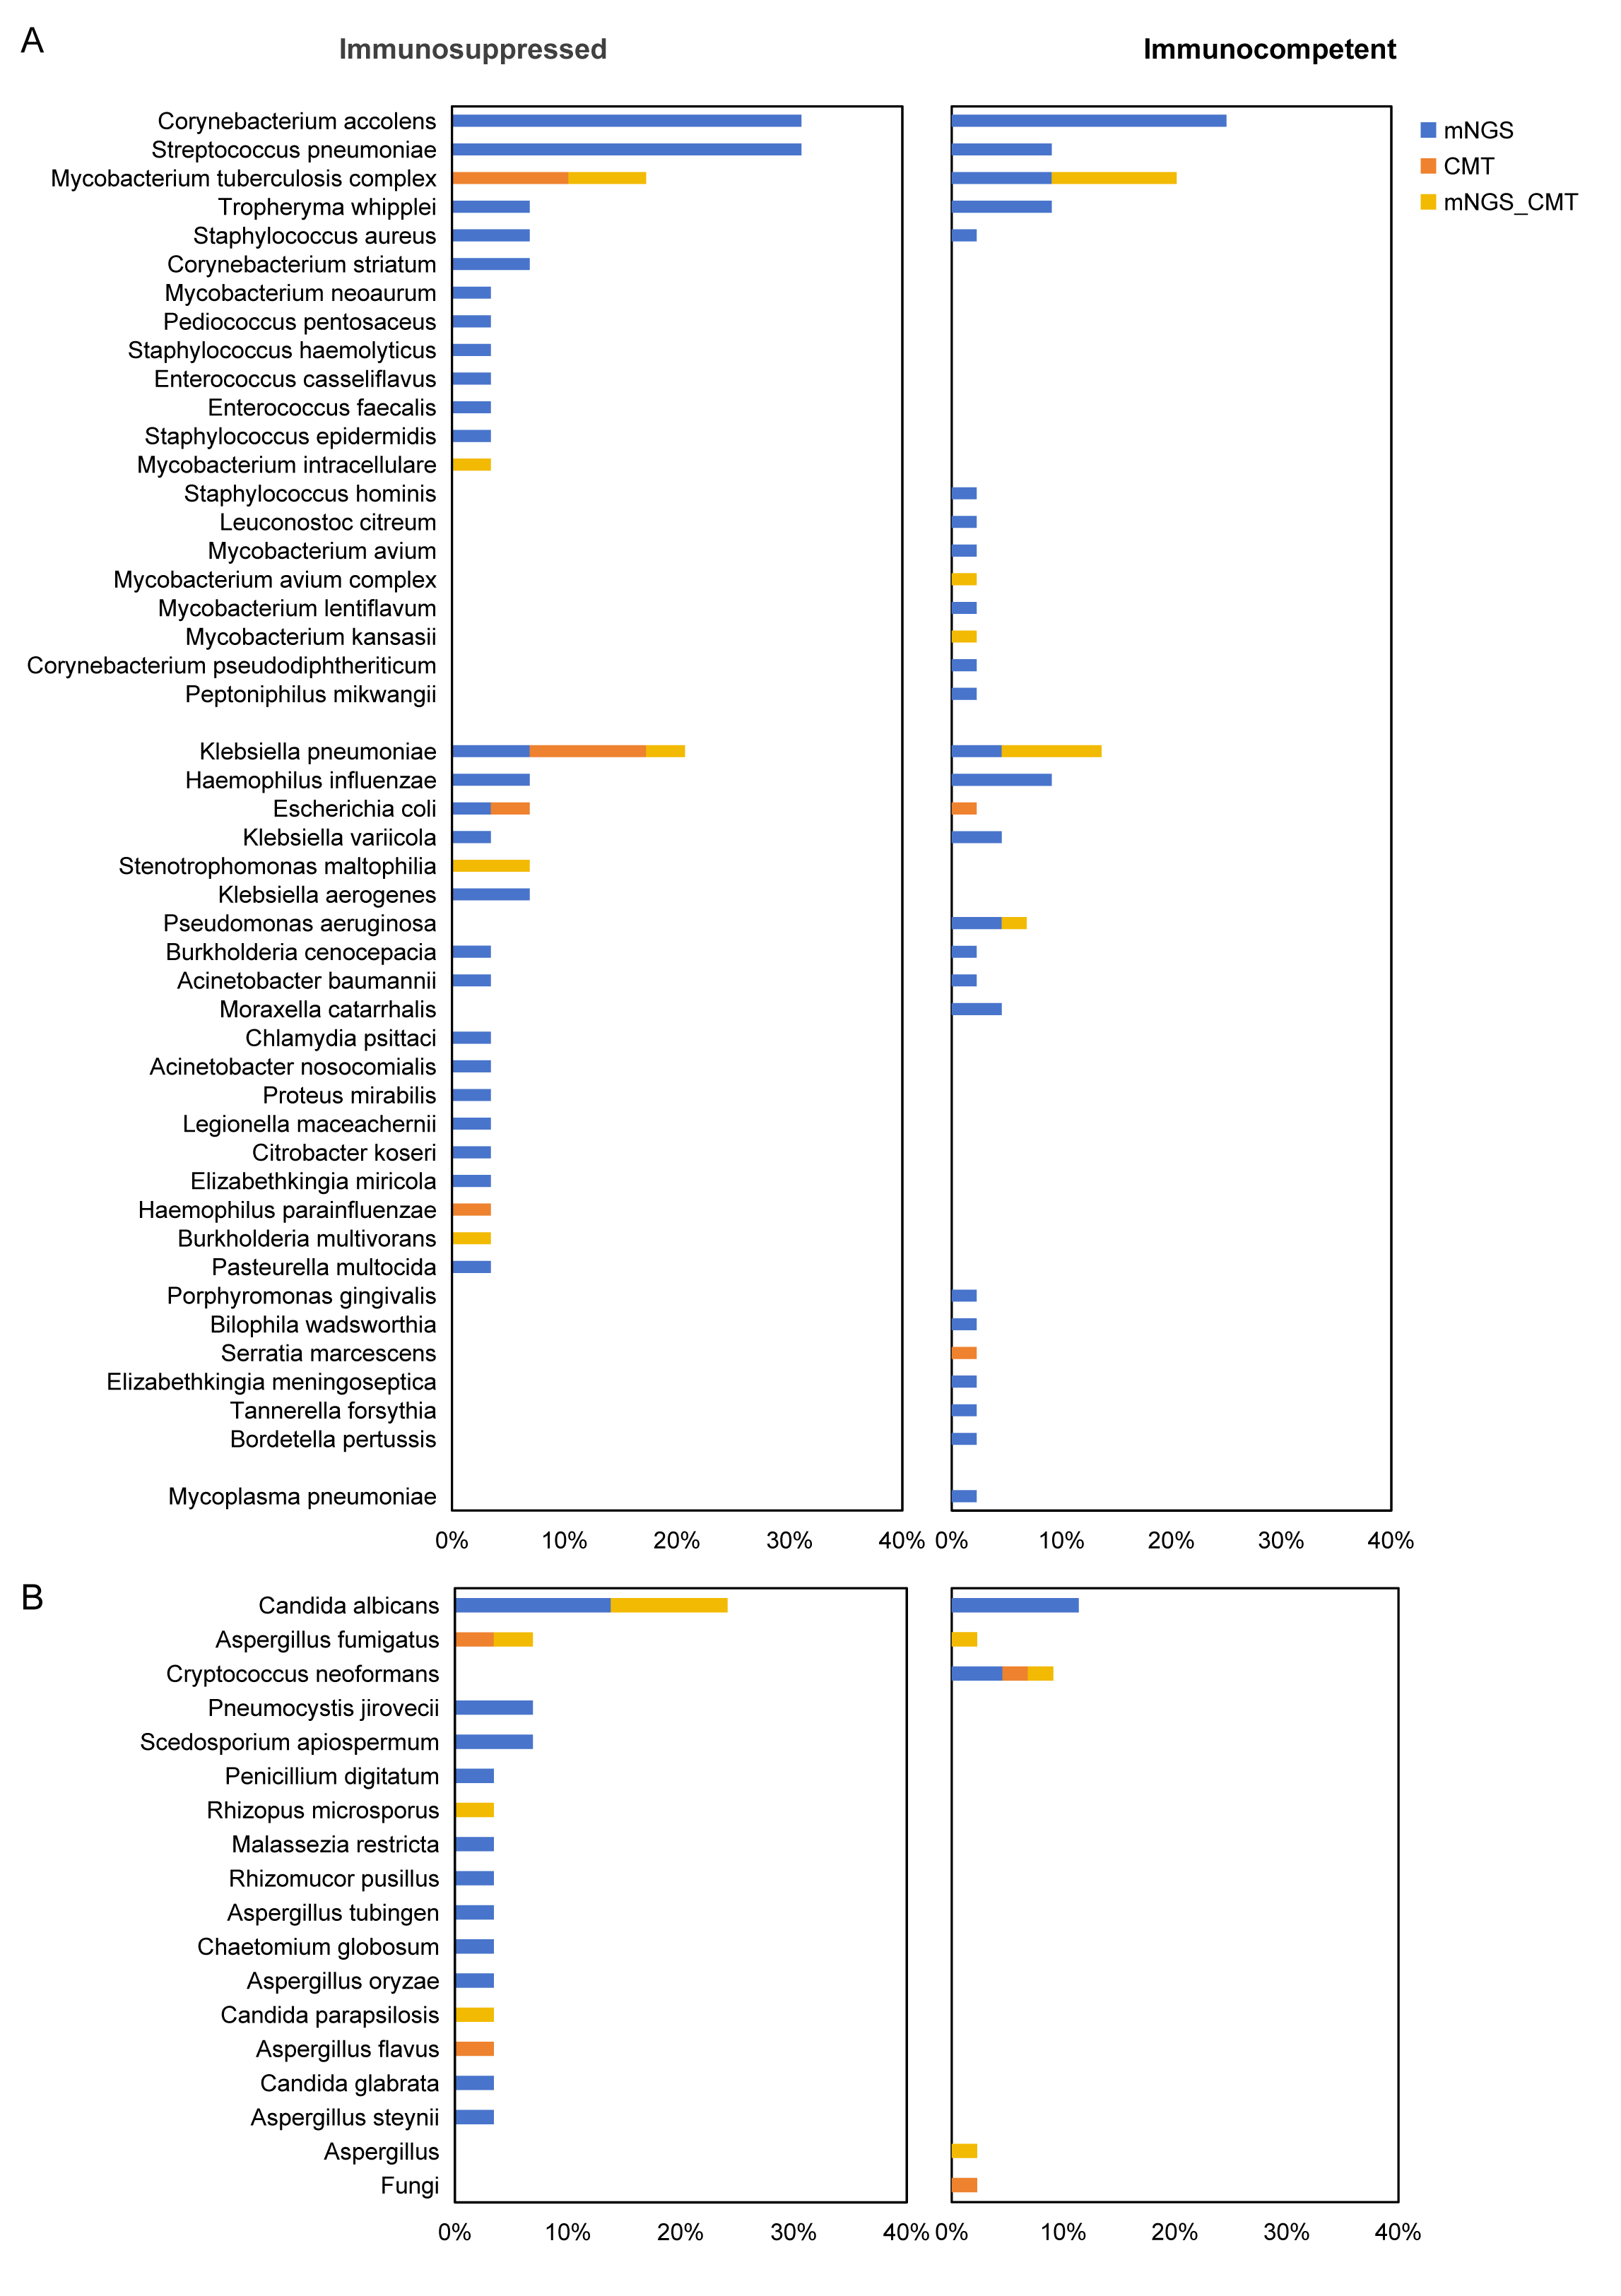


**Supplementary Figure 1**. The co-detected bacteria and fungi distribution in immunosuppressed and immunocompetent patients with herpesvirus detection. (A) The distribution of bacteria detected by mNGS and CMT. (B) The distribution of bacteria detected by mNGS and CMT. The X-axis represents the detection rate of the pathogen, defined as the ratio of the number of samples in which the pathogen was detected to the total number of samples in the group.

**
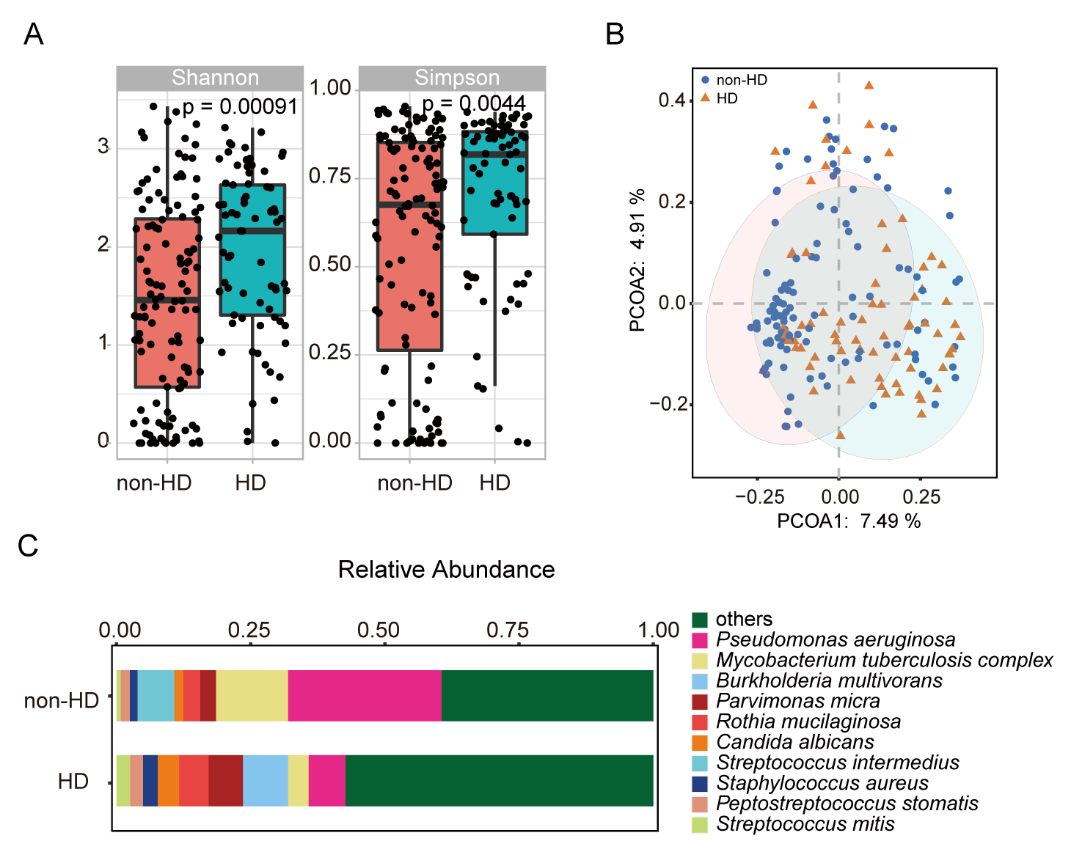
**

**Supplementary Figure 2.** Microbiome composition analysis in the lungs of the HD and non-HD groups. (A) Assessment of alpha diversity. (B) Evaluation of beta diversity using PCoA for lung microorganism in the two groups. (C) Identification of the top 10 most abundant species in the HD and non-HD groups.


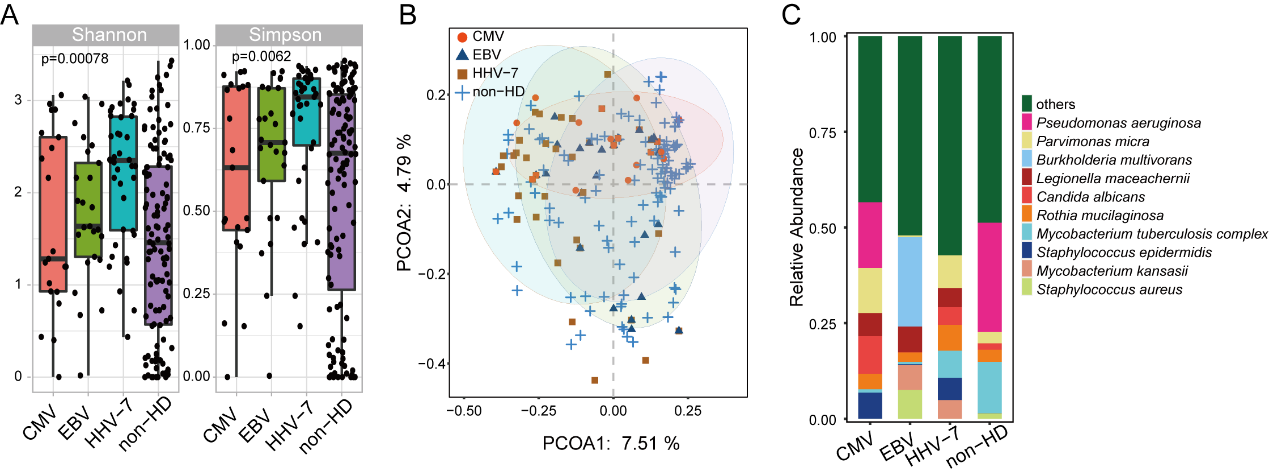


**Supplementary Figure 3**. Microbiome composition analysis in the lungs of HHV-7, EBV and CMV detected and non-HD groups. (A) Assessment of alpha diversity. (B) Evaluation of beta diversity using PCoA for lung microorganism in these groups. (C) Identification of the top 10 most abundant species in these groups.


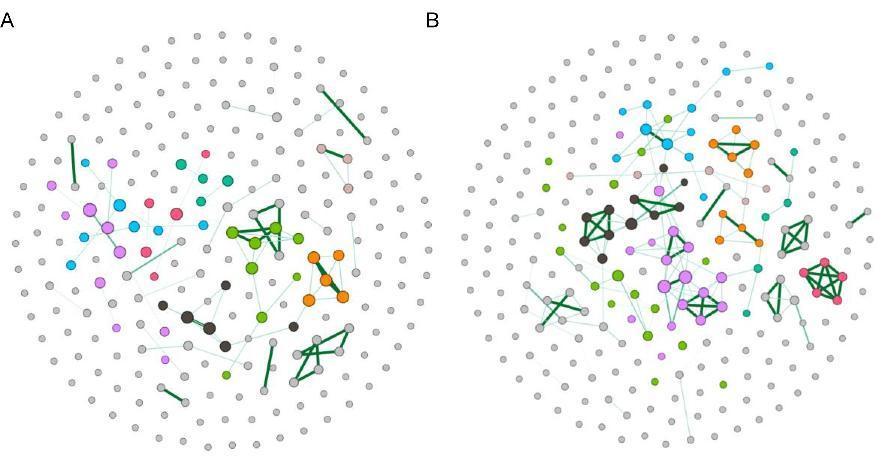


**Supplementary Figure 4.** Co-occurring microbial community network in BALF samples from patients in the non-HD (A) and HD (B) groups using correlation analysis. Network connections indicate strong (ρ > 0.6) and significant (*P* < 0.05) correlations. Nodes are categorized by modularity class, and node size is relative to connections number. Edge thickness corresponds to edge weight.


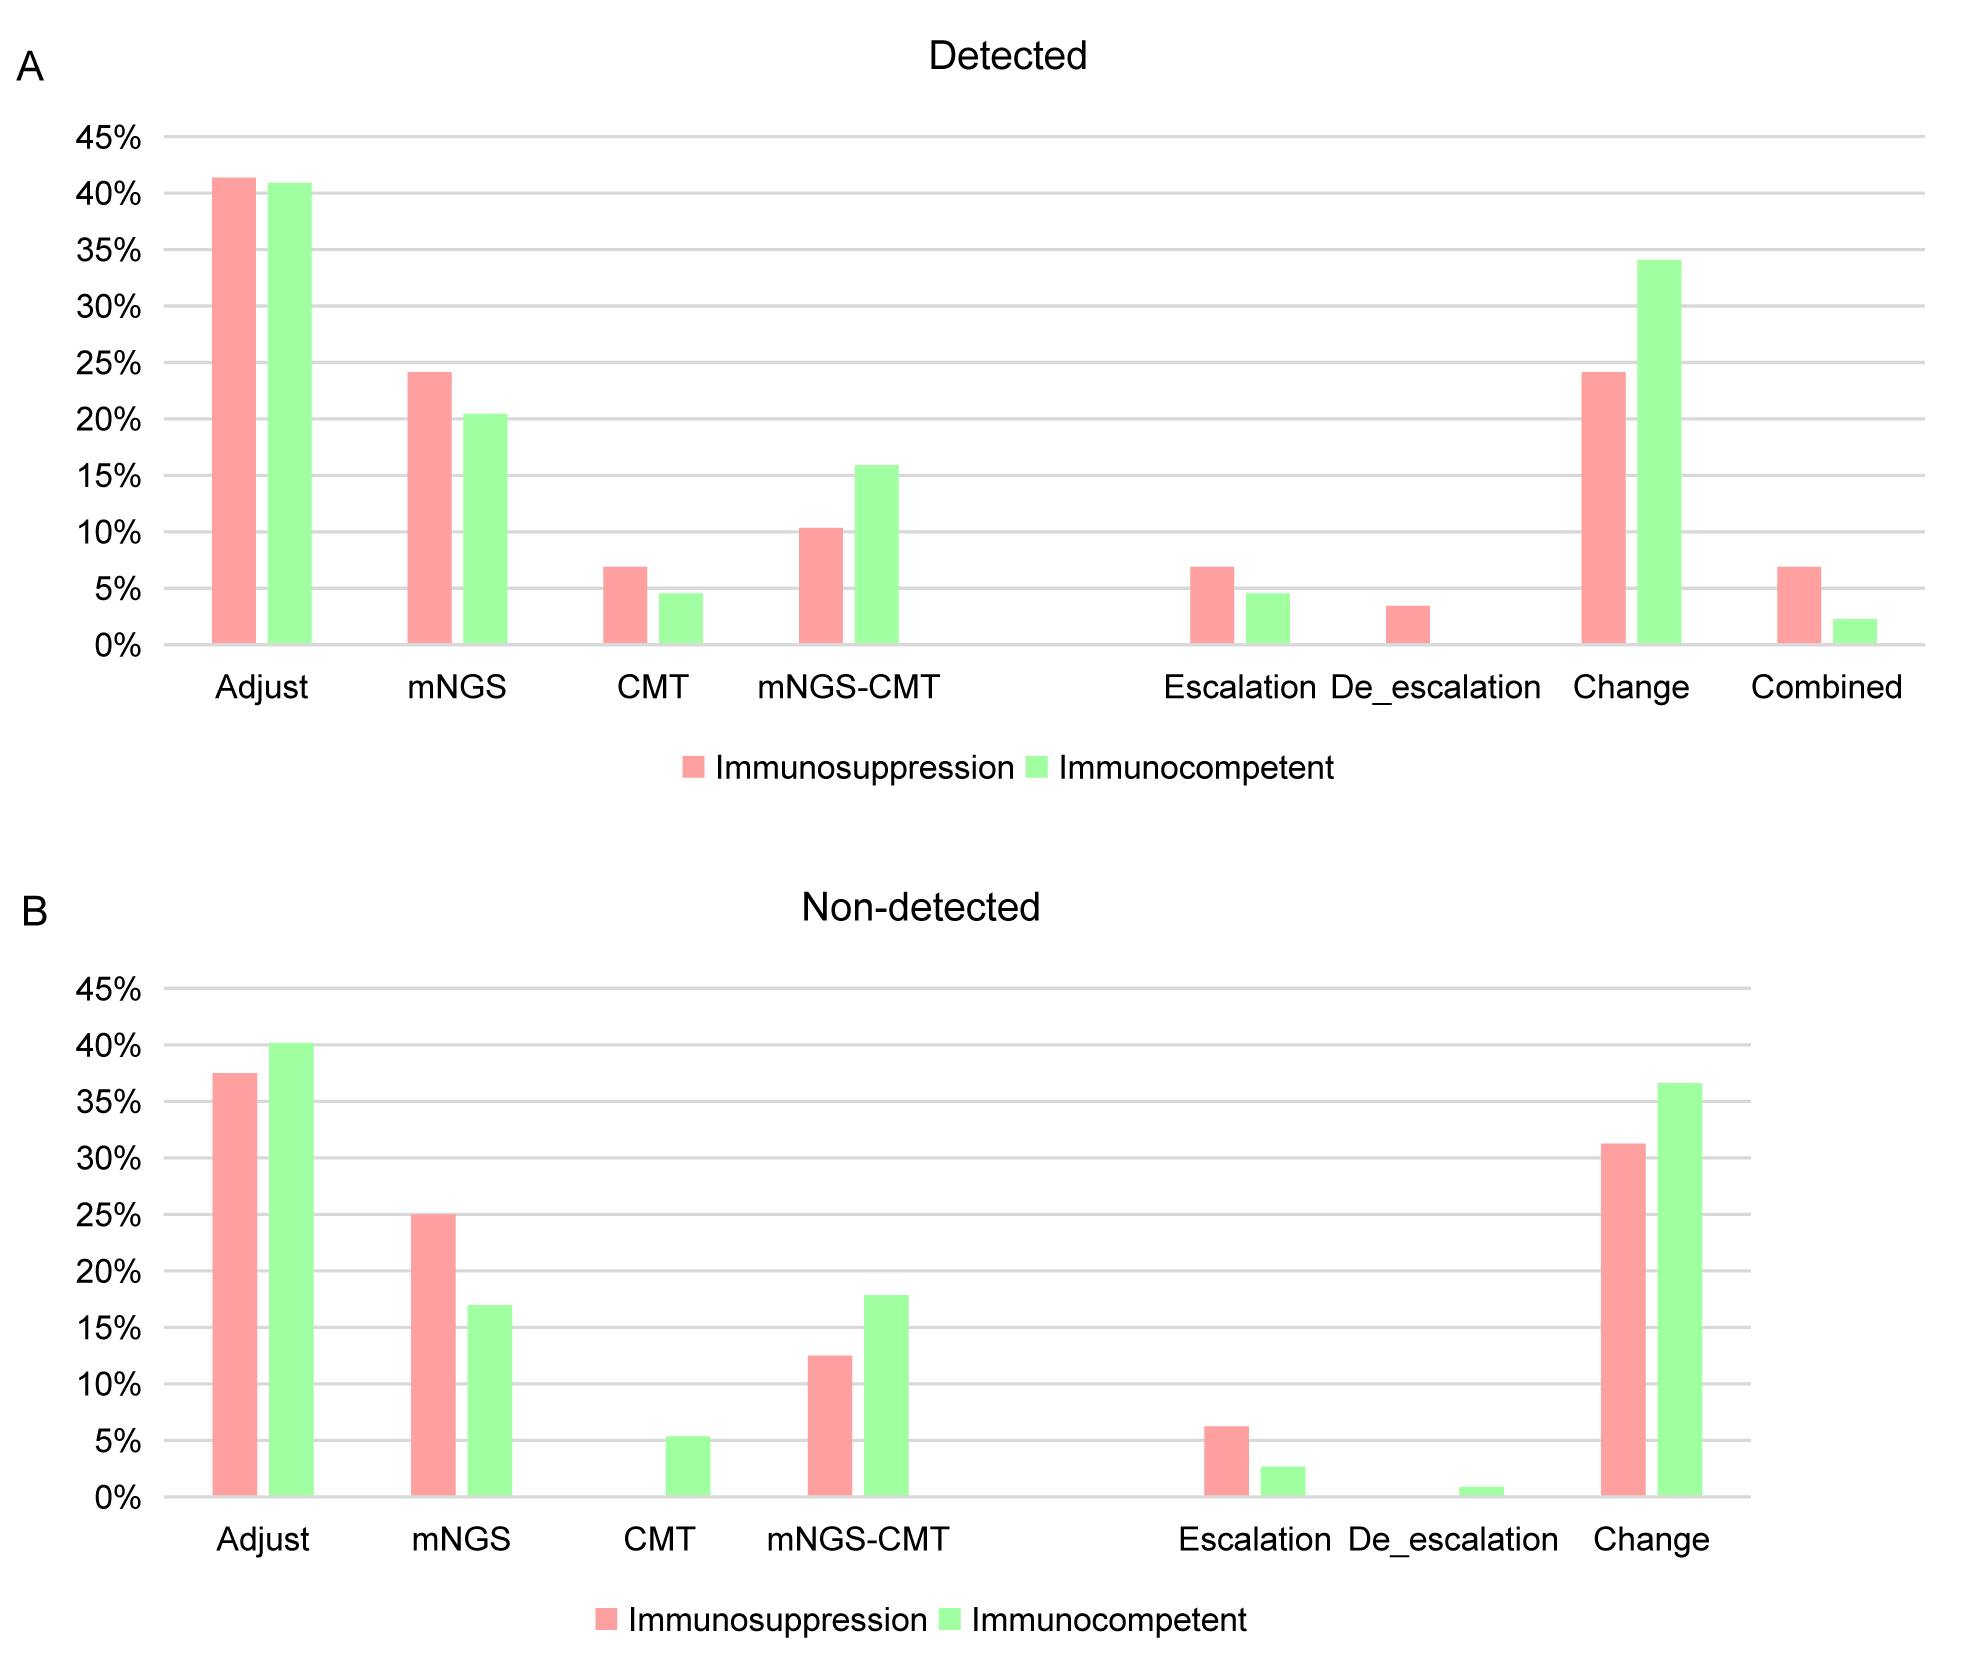


**Supplementary Figure 5.** The effect of immunosuppressive status on antibiotic adjustment in patients in the (A) HD and (B) non-HD groups.

## Supplementary Tables

**Supplementary table 1**. Distribution of pathogens detected by mNGS and CMT in all patients. "NA" indicates that this test was not performed.

| **ID** | **mNGS result** | | | **CMT** | | | | | | | | | |
| --- | --- | --- | --- | --- | --- | --- | --- | --- | --- | --- | --- | --- | --- |
| **Bacteria** | **Fungi** | **Virus** | **Smear** | **BALF culture** | **Blood culture** | **Sputum culture** | **G test** | **GM test** | **GXM test** | **T-spot** | **GeneXpert** | **Herpesvirus lgG/ Nucleic acid test for 13 respiratory pathogens** |
| 1 |  |  |  | NA | Negative | NA | Negative | Negative | Negative | Negative | NA | NA | NA |
| 2 | Corynebacterium accolens-578 Mycobacterium tuberculosis complex-30 Haemophilus influenzae-188 | Aspergillus fumigatus-2666 |  | Negative | Negative | NA | Negative | NA | NA | NA | Positive | Negative | Negative |
| 3 | Corynebacterium accolens-131 |  |  | Negative | Negative | NA | Negative | Negative | Negative | Negative | Negative | NA | Negative |
| 4 | Streptococcus pneumoniae-5141 | Candida albicans-81099 Aspergillus tubingen-1181 | Human betaherpesvirus 6B-4 Cytomegalovirus-40 | Negative | Candida albicans | NA | Negative | Negative | Positive | Positive | NA | NA | Negative |
| 5 | Staphylococcus aureus-170 Mycobacterium tuberculosis complex-8 |  | Human betaherpesvirus 7-102 | Negative | Negative | NA | Negative | Negative | Negative | Negative | NA | Negative | Negative |
| 6 | Mycobacterium tuberculosis complex-5289 |  | Human betaherpesvirus 7-2 | Negative | Negative | NA | Negative | NA | NA | NA | NA | Positive | NA |
| 7 | Mycobacterium tuberculosis complex-7483 Corynebacterium accolens-97 | Penicillium digitatum-41 | Human betaherpesvirus 7-30 Epstein-Barr virus-15 | Negative | Negative | NA | Negative | Negative | Negative | Negative | NA | Positive | NA |
| 8 | Mycobacterium tuberculosis complex-699 Mycobacterium avium-7405 |  | Cytomegalovirus-13 Human betaherpesvirus 7-28 | Negative | Negative | NA | Negative | NA | NA | NA | NA | Positive | NA |
| 9 | Streptococcus pneumoniae-3014 Klebsiella aerogenes-88 Staphylococcus aureus-59 |  | Human betaherpesvirus 7-21 | Negative | Negative | NA | Negative | Negative | Negative | Negative | Positive | Negative | Epstein-Barr virus |
| 10 |  | Aspergillus fumigatus-21 |  | Negative | Negative | NA | Negative | Negative | Negative | Negative | NA | NA | Negative |
| 11 | Pediococcus pentosaceus-82 Mycobacterium tuberculosis complex-2764 Corynebacterium accolens-98 |  | Epstein-Barr virus-36 | Negative | Negative | NA | Negative | NA | Negative | Negative | Positive | Positive | NA |
| 12 | Mycobacterium kansasii-108827 |  | Epstein-Barr virus-203 Human betaherpesvirus 7-466 | Negative | Negative | NA | Mycobacterium | NA | NA | NA | NA | Negative | NA |
| 13 | Corynebacterium accolens-516 Mycobacterium tuberculosis complex-279358 Proteus mirabilis-30 Klebsiella variicola-101 |  |  | acid-fast bacillus | Klebsiella pneumoniae Streptococcus pneumoniae | NA | Mycobacterium | NA | NA | NA | Positive | Positive | NA |
| 14 | Staphylococcus hominis-80 |  | Epstein-Barr virus-7 | Negative | Negative | NA | Negative | Negative | Negative | Negative | Negative | Negative | NA |
| 15 |  |  |  | Negative | Negative | Negative | Negative | Negative | Negative | Negative | NA | Negative | NA |
| 16 | Mycobacterium tuberculosis complex-144 |  |  | Negative | Negative | Negative | Negative | NA | NA | NA | NA | Negative | NA |
| 17 | Mycobacterium tuberculosis complex-4 |  |  | acid-fast bacillus | Negative | NA | Negative | Negative | Negative | Negative | NA | Negative | NA |
| 18 | Streptococcus pneumoniae-3946 | Aspergillus oryzae-412 Rhizopus microsporus-761 Rhizomucor pusillus-1 | Cytomegalovirus-985 Human alphaherpesvirus 1-14047 Epstein-Barr virus-346 | fungal spore | Rhizopus microsporus | Negative | Escherichia coli | Negative | Positive | Positive | NA | Negative | Negative |
| 19 | Corynebacterium accolens-126 |  | Epstein-Barr virus-11 Human betaherpesvirus 7-8 | Negative | Negative | Negative | Negative | Negative | NA | NA | NA | Negative | NA |
| 20 | Streptococcus pneumoniae-281 Corynebacterium accolens-131 |  | Human betaherpesvirus 6B-9 | Negative | Negative | NA | Negative | NA | NA | NA | NA | NA | NA |
| 21 | Haemophilus influenzae-24 |  |  | Negative | Negative | NA | Negative | NA | NA | NA | NA | NA | Negative |
| 22 | Tropheryma whipplei-1459 Mycobacterium tuberculosis complex-430 Bordetella pertussis-46 |  | Human betaherpesvirus 7-14 | NA | Negative | NA | Negative | NA | NA | NA | NA | NA | NA |
| 23 | Enterobacter kobei-125 Acinetobacter nosocomialis-1343 | Candida albicans-65704 |  | Negative | Negative | Negative | Negative | NA | Positive | Positive | NA | NA | NA |
| 24 | Corynebacterium accolens-29 |  | Epstein-Barr virus-2 | Negative | Negative | Negative | Negative | NA | NA | NA | NA | NA | NA |
| 25 | Mycobacterium avium complex-940 Streptococcus pneumoniae-60 |  |  | NA | Aspergillus niger | NA | Negative | NA | NA | NA | NA | NA | Cytomegalovirus |
| 26 | Haemophilus influenzae-428 Corynebacterium pseudodiphtheriticum-291 | Aspergillus fumigatus-84 | Human betaherpesvirus 7-41 | NA | Aspergillus fumigatus | NA | Negative | NA | NA | NA | NA | NA | NA |
| 27 | Klebsiella variicola-27 Elizabethkingia meningoseptica-33 |  | Epstein-Barr virus-12 | Negative | Negative | NA | Negative | Negative | Negative | Negative | NA | NA | NA |
| 28 |  | Candida albicans-26 | Human betaherpesvirus 7-63 Epstein-Barr virus-1079 | Negative | Negative | Negative | Negative | Positive | Negative | Negative | NA | Negative | NA |
| 29 | Streptococcus pneumoniae-2958 Haemophilus influenzae-5784 Corynebacterium accolens-354 |  |  | Negative | Negative | NA | Negative | Negative | Negative | Negative | NA | NA | Negative |
| 30 | Mycobacterium tuberculosis complex-1668 Staphylococcus aureus-63053 |  |  | Negative | Staphylococcus aureus | NA | NA | Negative | Positive | Positive | NA | Positive | Negative |
| 31 | Klebsiella aerogenes-21 |  | Epstein-Barr virus-369 Cytomegalovirus-4223 | Negative | Negative | NA | Negative | NA | NA | NA | NA | Negative | NA |
| 32 | Mycobacterium avium complex-5525 |  |  | Negative | Negative | NA | Negative | Negative | Negative | Negative | NA | Negative | NA |
| 33 | Tropheryma whipplei-3602 Klebsiella variicola-7620 |  | Human betaherpesvirus 6B-3 | Negative | Negative | NA | Negative | Negative | Negative | Positive | NA | Negative | Negative |
| 34 |  | Aspergillus fumigatus-30 |  | Negative | Negative | NA | Negative | Negative | Negative | Negative | NA | Negative | Negative |
| 35 | Haemophilus influenzae-39 |  |  | Negative | Negative | NA | Negative | Negative | Negative | Negative | NA | NA | NA |
| 36 | Haemophilus influenzae-7233 Corynebacterium accolens-455 |  | Human betaherpesvirus 7-36 | Negative | Escherichia coli | NA | Negative | NA | NA | NA | NA | NA | Negative |
| 37 | Moraxella catarrhalis-62 Mycobacterium avium complex-5066 Corynebacterium accolens-7187 |  | Human betaherpesvirus 7-219 | Negative | Mycobacterium | NA | Negative | NA | NA | NA | NA | Positive | Negative |
| 38 | Mycobacterium tuberculosis complex-6195 |  | Human betaherpesvirus 7-36 | Negative | Negative | Negative | Negative | NA | NA | NA | Negative | Negative | Negative |
| 39 | Tropheryma whipplei-313 |  | Human alphaherpesvirus 1-4 | Negative | Negative | Negative | Negative | NA | NA | NA | NA | NA | Negative |
| 40 |  |  | Human betaherpesvirus 7-5 | Negative | Negative | NA | Negative | Positive | Negative | Negative | NA | NA | Influenza A virus |
| 41 | Klebsiella aerogenes-766 Corynebacterium accolens-6922 Staphylococcus aureus-39 Tropheryma whipplei-210 |  |  | Negative | Negative | NA | Klebsiella aerogenes | Negative | Negative | Negative | NA | Negative | Negative |
| 42 |  |  |  | Negative | Negative | Negative | Negative | Negative | Negative | Negative | NA | NA | NA |
| 43 |  | Cryptococcus neoformans-5 |  | Negative | Negative | NA | Negative | Negative | Negative | Positive | NA | NA | NA |
| 44 |  | Aspergillus nidulans-330 |  | Negative | Negative | NA | Negative | Negative | Negative | Negative | NA | NA | NA |
| 45 |  |  |  | Negative | Negative | NA | Negative | Negative | Negative | Negative | NA | Negative | NA |
| 46 | Mycobacterium tuberculosis complex-70634 |  |  | acid-fast bacillus | Mycobacterium | NA | Negative | Negative | Negative | Negative | Positive | Positive | Negative |
| 47 | Staphylococcus aureus-33 Streptococcus pyogenes-63 Klebsiella pneumoniae-23 |  |  | Negative | Negative | NA | Negative | NA | NA | NA | NA | Negative | NA |
| 48 | Bilophila wadsworthia-3761 Mycobacterium tuberculosis complex-2 Corynebacterium accolens-1632 Serratia marcescens-29 |  |  | Negative | Negative | NA | Serratia marcescens | Negative | Negative | NA | NA | Negative | NA |
| 49 | Bilophila wadsworthia-35 |  | Human alphaherpesvirus 1-204 | Negative | Negative | NA | Negative | NA | NA | NA | NA | NA | Negative |
| 50 | Streptococcus agalactiae-422 Klebsiella pneumoniae-68 Mycobacterium tuberculosis complex-112956 |  |  | Negative | Negative | NA | NA | Negative | Negative | Negative | NA | Positive | Negative |
| 51 | Haemophilus influenzae-2679 |  |  | Negative | Negative | NA | Negative | Negative | Negative | Negative | NA | Negative | NA |
| 52 | Mycobacterium avium complex-43 |  |  | Negative | Negative | NA | Negative | Negative | Negative | Negative | NA | Negative | Negative |
| 53 | Staphylococcus epidermidis-126928 Tropheryma whipplei-25 Corynebacterium striatum-784 Elizabethkingia miricola-694 Stenotrophomonas maltophilia-16444 | Candida albicans-100843 Pneumocystis jirovecii-21 | Human betaherpesvirus 7-27 Human papillomavirus type 38-290 Human alphaherpesvirus 1-9119 Cytomegalovirus-55 | Negative | Stenotrophomonas maltophilia | NA | Stenotrophomonas maltophilia Klebsiella pneumoniae | Negative | Negative | Negative | NA | Negative | Cytomegalovirus Epstein-Barr virus |
| 54 | Chlamydia psittaci-2 |  | Epstein-Barr virus-3 | Negative | Negative | Negative | Negative | Negative | Negative | Negative | Negative | Negative | NA |
| 55 | Streptococcus pneumoniae-1373 Tropheryma whipplei-123 Streptococcus pseudopneumoniae-4867 |  |  | Negative | Negative | Negative | Negative | Negative | Negative | Negative | Negative | Negative | Negative |
| 56 |  | Aspergillus fumigatus-29 |  | Negative | Negative | Negative | Negative | Negative | Negative | Negative | NA | NA | Negative |
| 57 | Elizabethkingia anophelis-49 |  |  | Negative | Negative | Negative | Negative | Negative | Negative | Negative | Negative | Negative | NA |
| 58 | Streptococcus pneumoniae-268 | Scedosporium apiospermum-24 | Cytomegalovirus-2 | NA | Negative | NA | Negative | Negative | Negative | NA | NA | NA | Negative |
| 59 | Escherichia coli-113 | Aspergillus sydowii-173 |  | NA | Escherichia coli | NA | NA | NA | NA | NA | NA | NA | NA |
| 60 | Haemophilus influenzae-28 Corynebacterium accolens-26000 Staphylococcus haemolyticus-1316 |  | Cytomegalovirus-9 | Negative | Negative | NA | Negative | NA | NA | NA | NA | NA | Negative |
| 61 | Streptococcus pneumoniae-66 | Talaromyces marneffei-1 |  | Negative | Negative | Negative | Negative | NA | NA | NA | NA | NA | Negative |
| 62 | Streptococcus pneumoniae-6640 |  | Human betaherpesvirus 7-10 | Negative | Negative | NA | Negative | NA | NA | NA | NA | NA | NA |
| 63 | Streptococcus pyogenes-65 Legionella pneumophila-1 |  |  | Negative | Negative | Negative | NA | NA | NA | NA | NA | NA | NA |
| 64 |  |  | Human betaherpesvirus 7-23 Epstein-Barr virus-2 | Negative | Negative | Negative | NA | Negative | Negative | Negative | NA | NA | NA |
| 65 | Mycobacterium intracellulare-4323 Corynebacterium accolens-3323 |  | Epstein-Barr virus-1683 | Negative | Negative | NA | Negative | Negative | Negative | Negative | NA | Positive | NA |
| 66 | Haemophilus influenzae-5527 |  |  | Negative | Negative | NA | Negative | Negative | Negative | Negative | Negative | Positive | Negative |
| 67 | Corynebacterium accolens-428 |  |  | Negative | Negative | NA | Negative | Negative | Negative | Negative | Negative | Negative | NA |
| 68 | Staphylococcus haemolyticus-54 Acinetobacter pittii-377 Klebsiella pneumoniae-38965 | Candida tropicalis-233 |  | Negative | Negative | Negative | Negative | Negative | Negative | Negative | Negative | Negative | NA |
| 69 | Klebsiella pneumoniae-1659 Corynebacterium accolens-7261 | Cryptococcus neoformans-44 |  | Negative | Negative | Negative | Klebsiella pneumoniae | Negative | Negative | Positive | Negative | Negative | NA |
| 70 | Klebsiella pneumoniae-772 Proteus mirabilis-97 Streptococcus pneumoniae-3760 Citrobacter koseri-1058 Corynebacterium accolens-7324 | Chaetomium globosum-170 | Human betaherpesvirus 7-22 | Negative | Klebsiella pneumoniae | NA | Negative | NA | NA | NA | Positive | Negative | Negative |
| 71 | Stenotrophomonas maltophilia-1345 Corynebacterium striatum-6973 Acinetobacter nosocomialis-3514 Enterococcus faecalis-759 Staphylococcus aureus-125880 Escherichia coli-29111 | Candida parapsilosis-209 | Human alphaherpesvirus 1-29561 Epstein-Barr virus-6 | Negative | Klebsiella pneumoniae | NA | Klebsiella pneumoniae Stenotrophomonas maltophilia | Negative | Positive | Negative | NA | Negative | Negative |
| 72 | Mycobacterium avium-6220 |  |  | Negative | Negative | NA | Negative | Negative | Negative | Negative | Negative | Positive | NA |
| 73 | Burkholderia multivorans-391889 Klebsiella pneumoniae-22 | Candida albicans-159 | Epstein-Barr virus-3 Human betaherpesvirus 6B-48 | Negative | Burkholderia cepacia | Negative | Negative | Negative | Positive | Negative | Negative | Negative | Negative |
| 74 |  |  |  | Negative | Negative | NA | Negative | Negative | Negative | Negative | Negative | Negative | NA |
| 75 | Bacillus cereus group-32 |  |  | Negative | Negative | NA | Negative | Negative | Negative | Negative | Negative | Negative | NA |
| 76 | Corynebacterium accolens-46350 |  | Epstein-Barr virus-81 | Negative | Negative | NA | Negative | Negative | Negative | Negative | Negative | Negative | Epstein-Barr virus |
| 77 | Corynebacterium accolens-5571 |  | Epstein-Barr virus-8 | Negative | Negative | NA | Negative | Negative | Negative | Negative | Negative | Negative | Epstein-Barr virus |
| 78 | Leuconostoc citreum-42 |  | Human betaherpesvirus 7-25 | Negative | Negative | NA | Negative | Negative | Negative | Negative | Negative | Negative | NA |
| 79 |  |  |  | Negative | Negative | NA | Negative | Negative | Negative | Negative | Negative | Negative | NA |
| 80 | Klebsiella pneumoniae-3822 | Candida albicans-28 | Human alphaherpesvirus 1-55 | Negative | Klebsiella pneumoniae | Klebsiella pneumoniae | Klebsiella pneumoniae | Negative | Negative | Negative | Negative | Negative | Negative |
| 81 | Mycobacterium tuberculosis complex-7 |  |  | Negative | Negative | NA | Negative | Negative | Negative | Negative | Negative | Negative | NA |
| 82 |  | Cryptococcus neoformans-1485 | Human betaherpesvirus 7-11 | Negative | Negative | NA | Negative | Negative | Negative | Negative | Negative | Negative | Negative |
| 83 | Corynebacterium accolens-80 | Cryptococcus neoformans-1 | Human betaherpesvirus 7-11 | Negative | Negative | Negative | Negative | Negative | Negative | Negative | Negative | Negative | Negative |
| 84 | Corynebacterium accolens-95 |  | Human betaherpesvirus 7-18 | Negative | Negative | NA | Negative | Negative | Negative | Negative | Negative | Negative | Negative |
| 85 | Corynebacterium accolens-24 | Aspergillus nidulans-22 | Cytomegalovirus-117 | Negative | Aspergillus niger | NA | Negative | Negative | Negative | Negative | NA | NA | Cytomegalovirus |
| 86 | Pseudomonas aeruginosa-469162 |  |  | Negative | Pseudomonas aeruginosa | NA | Pseudomonas aeruginosa | Negative | Negative | Negative | Negative | Negative | NA |
| 87 | Staphylococcus hominis-59 Haemophilus influenzae-540 Mycobacterium avium complex-2622 Pseudomonas aeruginosa-93 | Rhizopus microsporus-42 |  | Negative | Pseudomonas aeruginosa | NA | Negative | Negative | Negative | Negative | Negative | Positive | NA |
| 88 |  |  |  | Negative | Negative | Negative | Negative | Negative | Negative | Negative | Negative | Negative | NA |
| 89 | Mycoplasma pneumoniae-2950 |  |  | Negative | Negative | Negative | Negative | Negative | Negative | Negative | Negative | Negative | Negative |
| 90 | Chlamydia psittaci-1316 |  |  | Negative | Negative | Negative | Negative | Negative | Negative | Negative | Negative | Negative | Negative |
| 91 | Legionella maceachernii-112997 | Candida albicans-236 | Epstein-Barr virus-165 Cytomegalovirus-9 Human betaherpesvirus 7-54 | Negative | Negative | Negative | Negative | Negative | Negative | Negative | Negative | Negative | Negative |
| 92 | Tropheryma whipplei-35 Mycobacterium neoaurum-23 |  | Cytomegalovirus-2 | Negative | Aspergillus flavus | Negative | Negative | Negative | Negative | Negative | Negative | Negative | NA |
| 93 | Mycobacterium avium complex-38 Legionella maceachernii-93 |  |  | Negative | Negative | Negative | Negative | Negative | Negative | Negative | Negative | Positive | NA |
| 94 | Corynebacterium accolens-1563 Mycobacterium avium complex-70 Tropheryma whipplei-1214 |  |  | Negative | Negative | Negative | Negative | Negative | Negative | Negative | Negative | Negative | NA |
| 95 | Corynebacterium accolens-23617 |  |  | Negative | Negative | Negative | Negative | Negative | Negative | Negative | Negative | Negative | NA |
| 96 |  |  |  | Negative | Negative | Negative | Negative | Negative | Negative | Positive | Negative | Negative | NA |
| 97 | Stenotrophomonas maltophilia-2452 |  |  | Negative | Stenotrophomonas maltophilia | Negative | Negative | Negative | Negative | Negative | Negative | Negative | NA |
| 98 |  |  |  | Negative | Negative | Negative | Negative | Negative | Negative | Negative | Negative | Negative | NA |
| 99 | Acinetobacter baumannii-895 Corynebacterium accolens-2317 |  |  | Negative | Negative | Negative | Negative | Negative | Negative | Negative | Negative | Negative | Negative |
| 100 | Mycobacterium tuberculosis complex-58154 Acinetobacter baumannii-133 |  |  | Negative | Negative | Negative | Negative | Negative | Negative | Negative | Positive | Negative | NA |
| 101 | Corynebacterium accolens-29 |  |  | Negative | Negative | Negative | Negative | Negative | Negative | Negative | Negative | Negative | NA |
| 102 | Legionella pneumophila-31 |  |  | Negative | Negative | Negative | Klebsiella pneumoniae | Negative | Negative | Negative | Negative | Negative | Negative |
| 103 | Pseudomonas aeruginosa-369943 |  |  | Negative | Pseudomonas aeruginosa | Negative | Pseudomonas aeruginosa | Negative | Negative | Negative | Negative | Negative | NA |
| 104 |  | Pneumocystis jirovecii-429 Aspergillus terreus-18185 Scedosporium apiospermum-787 | Cytomegalovirus-347 Hepatitis B virus-10 | Negative | Aspergillus fumigatus | Negative | Negative | Negative | Negative | Negative | Negative | Negative | Cytomegalovirus Epstein-Barr virus |
| 105 | Stenotrophomonas maltophilia-29 Mycoplasma pneumoniae-1 | Aspergillus fumigatus-269 |  | Negative | Negative | Negative | Negative | Negative | Negative | Negative | Negative | Negative | Negative |
| 106 | Corynebacterium accolens-20 Staphylococcus aureus-58 |  |  | Negative | Negative | Negative | Negative | Negative | Negative | Negative | Negative | Negative | Negative |
| 107 | Mycobacterium tuberculosis complex-2621 |  |  | Negative | Negative | Negative | Negative | Negative | Negative | Negative | Negative | Negative | NA |
| 108 | Roseomonas mucosa-60 Tropheryma whipplei-704 Corynebacterium accolens-2623 | Aspergillus fumigatus-2291 |  | Negative | Negative | Negative | Negative | Negative | Negative | Negative | Negative | Negative | Negative |
| 109 | Corynebacterium accolens-69 | Candida albicans-20 |  | Negative | Negative | Negative | Negative | Negative | Negative | Positive | Negative | Negative | NA |
| 110 | Mycobacterium tuberculosis complex-613 Streptococcus pneumoniae-42 |  |  | Negative | Negative | Negative | Negative | Negative | Negative | Negative | Negative | Positive | NA |
| 111 | Moraxella catarrhalis-3145 Tropheryma whipplei-37 |  | Epstein-Barr virus-113 | Negative | Negative | Negative | Negative | Negative | Negative | Negative | Negative | Negative | NA |
| 112 | Corynebacterium accolens-1159 Mycobacterium avium complex-866 |  |  | Negative | Negative | Negative | Negative | Negative | Negative | Negative | Negative | Negative | NA |
| 113 |  | Candida albicans-2520 Aspergillus steynii-48 | Human betaherpesvirus 7-35 | Negative | Negative | Negative | Negative | Negative | Negative | Negative | Negative | Negative | NA |
| 114 | Corynebacterium accolens-28 |  |  | Negative | Negative | Negative | Negative | Negative | Negative | Negative | Negative | Negative | NA |
| 115 | Pseudomonas aeruginosa-46841 |  |  | Negative | Pseudomonas aeruginosa | Negative | Negative | Negative | Negative | Negative | Negative | Negative | NA |
| 116 |  |  | Human adenovirus species C-3 | Negative | Negative | Negative | Negative | Negative | Negative | Negative | Negative | Negative | NA |
| 117 | Pasteurella multocida-1060 Haemophilus influenzae-229 Streptococcus pneumoniae-1060 |  | Cytomegalovirus-23 | Negative | Negative | Negative | Klebsiella pneumoniae | Negative | Negative | Negative | Negative | Negative | NA |
| 118 | Tropheryma whipplei-47 Pseudomonas aeruginosa-24 |  |  | Negative | Negative | Negative | Negative | Negative | Negative | Negative | Negative | Negative | NA |
| 119 | Mycobacterium avium complex-333 Corynebacterium accolens-322 | Aspergillus fumigatus-33 Talaromyces marneffei-369 |  | Negative | Negative | Negative | Negative | Negative | Negative | Negative | Negative | Negative | NA |
| 120 | Mycobacterium tuberculosis complex-9057 |  |  | Negative | Negative | Negative | Negative | Negative | Negative | Negative | Negative | Negative | NA |
| 121 | Mycobacterium tuberculosis complex-9 |  |  | Negative | Negative | Negative | Negative | Negative | Negative | Negative | Negative | Negative | NA |
| 122 | Mycobacterium tuberculosis complex-3 Corynebacterium accolens-157 |  |  | Negative | Negative | Negative | Negative | Negative | Negative | Negative | Negative | Negative | NA |
| 123 | Corynebacterium kefirresidentii-255 |  |  | Negative | Negative | Negative | Negative | Negative | Negative | Negative | Negative | Negative | NA |
| 124 | Mycobacterium avium complex-103 Elizabethkingia anophelis-25 Corynebacterium accolens-773 Klebsiella pneumoniae-47 |  |  | Negative | Negative | Negative | Negative | Negative | Positive | Negative | Negative | Negative | NA |
| 125 |  |  |  | Negative | Negative | Negative | Negative | Negative | Negative | Negative | Negative | Negative | NA |
| 126 | Mycobacterium tuberculosis complex-280 |  | Epstein-Barr virus-6 | Negative | Negative | Negative | Negative | Negative | Negative | Negative | Negative | Negative | NA |
| 127 | Corynebacterium accolens-2448 |  |  | Negative | Negative | Negative | Negative | Negative | Negative | Negative | Negative | Negative | NA |
| 128 | Klebsiella pneumoniae-24 Mycobacterium tuberculosis complex-47 |  |  | Negative | Negative | Negative | Negative | Negative | Negative | Negative | Negative | Negative | NA |
| 129 | Staphylococcus aureus-259 Tropheryma whipplei-20 Haemophilus influenzae-28268 Elizabethkingia anophelis-6 Mycobacterium tuberculosis complex-1 |  |  | Negative | Negative | Negative | Negative | Negative | Negative | Negative | Negative | Negative | NA |
| 130 | Tropheryma whipplei-1281 Mycobacterium tuberculosis complex-217 | Exophiala oligosperma-67 |  | Negative | Negative | Negative | Negative | Negative | Negative | Negative | Negative | Negative | NA |
| 131 | Mycobacterium avium complex-2445 | Scedosporium apiospermum-1257 |  | Negative | Negative | Negative | Negative | Negative | Negative | Negative | Negative | Negative | Negative |
| 132 |  |  |  | Negative | Negative | Negative | Negative | Negative | Negative | Negative | Negative | Negative | NA |
| 133 |  |  |  | Negative | Negative | Negative | Negative | Negative | Negative | Negative | Negative | Negative | NA |
| 134 |  |  |  | Negative | Negative | Negative | Negative | Negative | Negative | Negative | Negative | Negative | NA |
| 135 | Mycobacterium tuberculosis complex-197 |  |  | Negative | Negative | Negative | Negative | Negative | Negative | Negative | Negative | Negative | NA |
| 136 | Mycobacterium tuberculosis complex-300 Pseudomonas aeruginosa-105 |  |  | Negative | Mycobacterium | Negative | Negative | Negative | Negative | Negative | Positive | Positive | Negative |
| 137 | Tropheryma whipplei-2800 Corynebacterium accolens-574 |  |  | Negative | Negative | Negative | Negative | Negative | Negative | Negative | Negative | Negative | Negative |
| 138 | Klebsiella pneumoniae-2263 Corynebacterium accolens-115 Mycobacterium tuberculosis complex-138383 |  | Human betaherpesvirus 7-25 | acid-fast bacillus | Klebsiella pneumoniae | Negative | Klebsiella pneumoniae | Negative | Negative | Negative | Negative | Positive | Negative |
| 139 |  |  | Human betaherpesvirus 7-20 | Negative | Negative | Negative | Negative | Negative | Negative | Negative | Negative | Negative | Negative |
| 140 | Pseudomonas aeruginosa-43659 |  |  | Negative | Pseudomonas aeruginosa | Negative | Pseudomonas aeruginosa | Negative | Negative | Negative | Negative | Negative | Negative |
| 141 |  | Candida albicans-234 | Human alphaherpesvirus 1-18 | Negative | Negative | Negative | Negative | Negative | Negative | Negative | Negative | Negative | Negative |
| 142 | Corynebacterium accolens-302 Mycoplasma pneumoniae-45 |  | Human betaherpesvirus 7-5 | Negative | Negative | Negative | Negative | Negative | Negative | Negative | Negative | Negative | Negative |
| 143 |  | Candida albicans-9315 Schizophyllum commune-12549 Aspergillus fumigatus-21014 |  | Negative | Aspergillus | Negative | Negative | Negative | Positive | Negative | Negative | Negative | Negative |
| 144 | Haemophilus influenzae-1525 Streptococcus pneumoniae-6490 |  | Cytomegalovirus-45 Epstein-Barr virus-788 Human betaherpesvirus 7-72 | Negative | Negative | Negative | Serratia marcescens | Negative | Negative | Negative | Negative | Negative | NA |
| 145 |  | Candida albicans-326 | SARS-CoV-2-8681 Cytomegalovirus-2132 Human betaherpesvirus 6B-33 | Negative | Negative | Negative | Negative | Negative | Negative | Negative | Negative | Negative | Cytomegalovirus Epstein-Barr virus |
| 146 | Mycoplasma pneumoniae-1 Pseudomonas aeruginosa-15151 |  |  | Negative | Negative | Negative | Staphylococcus aureus | Negative | Negative | Negative | Negative | Negative | Negative |
| 147 | Burkholderia cenocepacia-851 Klebsiella pneumoniae-215 Acinetobacter baumannii-3606 Enterococcus casseliflavus-22 | Candida glabrata-23 Candida albicans-139 | Human alphaherpesvirus 1-39279 Human betaherpesvirus 7-146 Cytomegalovirus-3 | Negative | Haemophilus parainfluenzae | Negative | Negative | Negative | Negative | Negative | Negative | Negative | NA |
| 148 | Corynebacterium accolens-768 | Cryptococcus neoformans-9 | Human betaherpesvirus 7-198 | Negative | Negative | Negative | Negative | Negative | Negative | Positive | Negative | Negative | NA |
| 149 | Burkholderia cenocepacia-128 Acinetobacter baumannii-719 Klebsiella pneumoniae-35 Pseudomonas aeruginosa-26 |  | Human alphaherpesvirus 1-386 Cytomegalovirus-9 Human betaherpesvirus 7-41 | Negative | Negative | Negative | Negative | Negative | Negative | Negative | Negative | Negative | NA |
| 150 | Corynebacterium accolens-199 |  |  | Negative | Negative | Negative | Negative | Negative | Negative | Negative | Negative | Negative | Negative |
| 151 | Corynebacterium accolens-1346 Mycobacterium tuberculosis complex-13821 |  |  | Negative | Negative | Negative | Negative | Negative | Negative | Negative | Negative | Negative | NA |
| 152 | Porphyromonas gingivalis-9073 Tannerella forsythia-21271 |  | Epstein-Barr virus-41 | Negative | Negative | Negative | Negative | Negative | Negative | Negative | Negative | Negative | Negative |
| 153 | Mycobacterium tuberculosis complex-7 Streptococcus pseudopneumoniae-24 | Candida albicans-32 |  | Negative | Mycobacterium | Negative | Negative | Negative | Negative | Negative | Negative | Positive | Negative |
| 154 | Chlamydia psittaci-121 |  |  | Negative | Negative | Negative | Negative | Negative | Negative | Negative | Negative | Negative | NA |
| 155 | Mycobacterium tuberculosis complex-1 |  |  | Negative | Negative | Negative | Negative | Negative | Negative | Negative | Negative | Negative | Negative |
| 156 | Streptococcus contellatus-57676 Slackia exigua-7083 Pseudoramibacter alactolyticus-8593 Peptostreptococcus stomatis-39624 |  |  | Negative | Negative | Negative | Negative | Negative | Negative | Negative | Negative | Negative | Negative |
| 157 | Mycobacterium tuberculosis complex-17 Klebsiella pneumoniae-12355 |  | Human betaherpesvirus 7-73 | Negative | Klebsiella pneumoniae | Negative | Negative | Negative | Negative | Negative | Positive | Positive | NA |
| 158 | Klebsiella pneumoniae-2803 |  | Cytomegalovirus-20 | Negative | Klebsiella pneumoniae | Negative | Negative | Negative | Negative | Negative | Negative | Negative | NA |
| 159 |  |  | Epstein-Barr virus-66 | Negative | Negative | Negative | Negative | Negative | Negative | Negative | Negative | Negative | NA |
| 160 |  | Aspergillus fumigatus-501 |  | Negative | Negative | Negative | Negative | Negative | Negative | Negative | Negative | Negative | NA |
| 161 | Streptococcus pneumoniae-162 |  |  | Negative | Negative | Negative | Negative | Negative | Negative | Negative | Negative | Negative | Negative |
| 162 |  | Aspergillus versicolor-30 |  | Negative | Negative | Negative | Negative | Negative | Negative | Positive | Negative | Negative | Negative |
| 163 |  | Aspergillus fumigatus-20 |  | Negative | Aspergillus fumigatus | Negative | Negative | Positive | Negative | Negative | Negative | Negative | Negative |
| 164 | Pseudomonas aeruginosa-319699 |  | Cytomegalovirus-2 | Negative | Pseudomonas aeruginosa | Negative | Negative | Negative | Negative | Negative | Negative | Negative | NA |
| 165 | Mycobacterium tuberculosis complex-1174 |  |  | Negative | Negative | Negative | Negative | Negative | Negative | Negative | Negative | Positive | NA |
| 166 | Corynebacterium amycolatum-170 | Cryptococcus neoformans-1 |  | Negative | Negative | Negative | Negative | Negative | Negative | Positive | Negative | Negative | NA |
| 167 | Mycobacterium tuberculosis complex-13665 |  |  | Negative | Negative | Negative | Negative | Negative | Negative | Negative | Negative | Positive | NA |
| 168 |  | Scedosporium apiospermum-2391 |  | Negative | Staphylococcus aureus | Negative | Negative | Negative | Negative | Negative | Negative | Negative | NA |
| 169 | Pseudomonas aeruginosa-583 Porphyromonas gingivalis-46396 |  |  | Negative | Negative | Negative | Negative | Negative | Negative | Negative | Negative | Negative | NA |
| 170 | Moraxella catarrhalis-34107 |  |  | Negative | Negative | Negative | Negative | Negative | Negative | Negative | Negative | Negative | NA |
| 171 | Paracoccus aeridis-369 Chlamydia psittaci-1 Mycobacterium tuberculosis complex-1 |  |  | Negative | Negative | Negative | Negative | Negative | Negative | Negative | Negative | Negative | NA |
| 172 | Haemophilus influenzae-30753 |  | Human betaherpesvirus 7-52 Cytomegalovirus-4 | Negative | Negative | Negative | Negative | Negative | Negative | Negative | Negative | Negative | NA |
| 173 | Corynebacterium pseudodiphtheriticum-124 Mycobacterium tuberculosis complex-8565 |  |  | Negative | Negative | Negative | Negative | Negative | Negative | Negative | Negative | Negative | NA |
| 174 | Staphylococcus aureus-50 |  |  | Negative | Negative | Negative | Negative | Negative | Negative | Negative | Negative | Negative | NA |
| 175 | Fusobacterium nucleatum-19952 |  |  | Negative | Negative | Negative | Negative | Negative | Negative | Negative | Negative | Negative | NA |
| 176 | Pseudomonas aeruginosa-24596 |  |  | Negative | Pseudomonas aeruginosa | Negative | Negative | Negative | Negative | Negative | Negative | Negative | NA |
| 177 | Tropheryma whipplei-110 Haemophilus influenzae-31 |  |  | Negative | Negative | Negative | Negative | Negative | Negative | Negative | Negative | Negative | NA |
| 178 | Corynebacterium accolens-854 Pseudomonas aeruginosa-321984 |  |  | Negative | Pseudomonas aeruginosa | Negative | Negative | Negative | Negative | Negative | Negative | Negative | NA |
| 179 | Mycobacterium tuberculosis complex-5 |  |  | Negative | Mycobacterium | Negative | Negative | Negative | Negative | Negative | Negative | Positive | NA |
| 180 | Haemophilus influenzae-25 |  |  | Negative | Negative | Negative | Negative | Negative | Negative | Negative | Negative | Negative | NA |
| 181 | Mycobacterium avium complex-13616 |  |  | Negative | Mycobacterium | Negative | Negative | Negative | Negative | Negative | Negative | Positive | NA |
| 182 | Mycobacterium tuberculosis complex-28315 Staphylococcus aureus-141 Streptococcus pneumoniae-705 Klebsiella pneumoniae-28 |  |  | Negative | Klebsiella pneumoniae Staphylococcus aureus Mycobacterium | Negative | Negative | Negative | Negative | Negative | Negative | Positive | NA |
| 183 | Mycobacterium tuberculosis complex-28 Corynebacterium accolens-395 Klebsiella aerogenes-38 Streptococcus intermedius-238835 |  |  | acid-fast bacillus | Staphylococcus aureus Klebsiella pneumoniae Mycobacterium tuberculosis | Negative | Klebsiella pneumoniae | Negative | Negative | Negative | Positive | Positive | NA |
| 184 | Corynebacterium accolens-813 Streptococcus agalactiae-34 Mycobacterium tuberculosis complex-107 Klebsiella pneumoniae-31 |  |  | Negative | Klebsiella pneumoniae Mycobacterium tuberculosis | Negative | Negative | Negative | Negative | Negative | Negative | Negative | NA |
| 185 | Corynebacterium accolens-38 |  |  | Negative | Negative | Negative | Negative | Negative | Negative | Negative | Positive | Positive | NA |
| 186 | Parvimonas micra-76039 Streptococcus intermedius-71827 Corynebacterium accolens-1433 Prevotella oris-73864 Tropheryma whipplei-149 |  |  | Negative | Negative | Negative | Negative | Negative | Negative | Negative | Negative | Negative | NA |
| 187 | Corynebacterium accolens-179 Mycobacterium tuberculosis complex-306 |  |  | acid-fast bacillus | Mycobacterium | Negative | Negative | Negative | Negative | Negative | Negative | Positive | NA |
| 188 |  |  |  | Negative | Negative | Negative | Proteus mirabilis | Negative | Negative | Negative | Negative | Negative | NA |
| 189 | Peptoniphilus mikwangii-1189 | Candida albicans-28 | Human betaherpesvirus 7-3 | NA | Negative | Negative | Negative | Negative | Negative | Negative | Negative | Negative | NA |
| 190 | Corynebacterium accolens-1759 Streptococcus pneumoniae-6033 |  | Cytomegalovirus-10 | Negative | Negative | Negative | Negative | Negative | Negative | Negative | Negative | Negative | NA |
| 191 | Mycobacterium lentiflavum-42 | Candida albicans-30 | Human betaherpesvirus 7-4 | Negative | Negative | Negative | Negative | Negative | Negative | Negative | Negative | Negative | NA |
| 192 | Pseudomonas aeruginosa-87 | Cladosporium sphaerospermum-49 |  | Negative | Negative | Negative | Negative | Negative | Negative | Negative | Negative | Negative | NA |
| 193 | Chlamydia psittaci-840 |  |  | Negative | Negative | Negative | Negative | Negative | Negative | Negative | Negative | Negative | Negative |
| 194 | Corynebacterium accolens-1202 Pseudomonas aeruginosa-18 |  | Human betaherpesvirus 7-9 | Negative | Negative | Negative | Negative | Negative | Negative | Negative | Negative | Negative | Negative |
| 195 | Mycoplasma pneumoniae-21319 |  |  | Negative | Negative | Negative | Negative | Negative | Negative | Negative | Negative | Negative | Negative |
| 196 | Streptococcus pneumoniae-4410 Mycobacterium tuberculosis complex-15553 Klebsiella pneumoniae-241 |  | Cytomegalovirus-195 | Negative | Negative | Negative | Negative | Negative | Negative | Negative | Positive | Positive | Negative |
| 197 | Streptococcus pneumoniae-381 |  |  | Negative | Negative | Negative | Negative | Negative | Negative | Negative | Negative | Negative | Negative |
| 198 |  | Malassezia restricta-2874 | Human betaherpesvirus 7-31 | Negative | Negative | Negative | Negative | Negative | Negative | Negative | Negative | Negative | Negative |
| 199 | Streptococcus pneumoniae-2080 |  | Epstein-Barr virus-4 Human betaherpesvirus 7-21 | Negative | Negative | Negative | Negative | Negative | Negative | Negative | Negative | Negative | NA |
| 200 | Streptococcus pneumoniae-1932 Klebsiella variicola-548 |  | Epstein-Barr virus-3 Human betaherpesvirus 7-15 | Negative | Aspergillus fumigatus Mycobacterium tuberculosis | Negative | Negative | Negative | Negative | Negative | Negative | Negative | NA |
| 201 | Mycobacterium tuberculosis complex-4247 Moraxella catarrhalis-31 |  |  | Negative | Mycobacterium tuberculosis | Negative | Negative | Negative | Negative | Negative | Negative | Negative | NA |

**Supplementary table 2**. Distribution of RPTM value of the detected herpesvirus.

| **Sample ID** | **HHV-7** | **EBV** | **CMV** | **HSV-1** | **HHV-6B** |
| --- | --- | --- | --- | --- | --- |
| 4 | 0 | 0 | 40 | 0 | 4 |
| 5 | 102 | 0 | 0 | 0 | 0 |
| 6 | 2 | 0 | 0 | 0 | 0 |
| 7 | 30 | 15 | 0 | 0 | 0 |
| 8 | 28 | 0 | 13 | 0 | 0 |
| 9 | 21 | 0 | 0 | 0 | 0 |
| 11 | 0 | 36 | 0 | 0 | 0 |
| 12 | 466 | 203 | 0 | 0 | 0 |
| 14 | 0 | 7 | 0 | 0 | 0 |
| 18 | 0 | 346 | 985 | 14047 | 0 |
| 19 | 8 | 11 | 0 | 0 | 0 |
| 20 | 0 | 0 | 0 | 0 | 9 |
| 22 | 14 | 0 | 0 | 0 | 0 |
| 24 | 0 | 2 | 0 | 0 | 0 |
| 26 | 41 | 0 | 0 | 0 | 0 |
| 27 | 0 | 12 | 0 | 0 | 0 |
| 28 | 63 | 1079 | 0 | 0 | 0 |
| 31 | 0 | 369 | 4223 | 0 | 0 |
| 33 | 0 | 0 | 0 | 0 | 3 |
| 36 | 36 | 0 | 0 | 0 | 0 |
| 37 | 219 | 0 | 0 | 0 | 0 |
| 38 | 36 | 0 | 0 | 0 | 0 |
| 39 | 0 | 0 | 0 | 4 | 0 |
| 40 | 5 | 0 | 0 | 0 | 0 |
| 49 | 0 | 0 | 0 | 204 | 0 |
| 53 | 27 | 0 | 55 | 9119 | 0 |
| 54 | 0 | 3 | 0 | 0 | 0 |
| 58 | 0 | 0 | 2 | 0 | 0 |
| 60 | 0 | 0 | 9 | 0 | 0 |
| 63 | 10 | 0 | 0 | 0 | 0 |
| 65 | 23 | 2 | 0 | 0 | 0 |
| 66 | 0 | 1683 | 0 | 0 | 0 |
| 71 | 22 | 0 | 0 | 0 | 0 |
| 72 | 0 | 6 | 0 | 29561 | 0 |
| 74 | 0 | 3 | 0 | 0 | 48 |
| 77 | 0 | 81 | 0 | 0 | 0 |
| 78 | 0 | 8 | 0 | 0 | 0 |
| 79 | 25 | 0 | 0 | 0 | 0 |
| 81 | 0 | 0 | 0 | 55 | 0 |
| 83 | 11 | 0 | 0 | 0 | 0 |
| 84 | 11 | 0 | 0 | 0 | 0 |
| 85 | 18 | 0 | 0 | 0 | 0 |
| 86 | 0 | 0 | 117 | 0 | 0 |
| 92 | 54 | 165 | 9 | 0 | 0 |
| 93 | 0 | 0 | 2 | 0 | 0 |
| 106 | 0 | 0 | 347 | 0 | 0 |
| 113 | 0 | 113 | 0 | 0 | 0 |
| 115 | 35 | 0 | 0 | 0 | 0 |
| 119 | 0 | 0 | 23 | 0 | 0 |
| 128 | 0 | 6 | 0 | 0 | 0 |
| 141 | 25 | 0 | 0 | 0 | 0 |
| 142 | 20 | 0 | 0 | 0 | 0 |
| 144 | 0 | 0 | 0 | 18 | 0 |
| 147 | 5 | 0 | 0 | 0 | 0 |
| 149 | 72 | 788 | 45 | 0 | 0 |
| 150 | 0 | 0 | 2132 | 0 | 33 |
| 152 | 146 | 0 | 3 | 39279 | 0 |
| 153 | 198 | 0 | 0 | 0 | 0 |
| 154 | 41 | 0 | 9 | 386 | 0 |
| 157 | 0 | 41 | 0 | 0 | 0 |
| 162 | 73 | 0 | 0 | 0 | 0 |
| 163 | 0 | 0 | 20 | 0 | 0 |
| 164 | 0 | 66 | 0 | 0 | 0 |
| 169 | 0 | 0 | 2 | 0 | 0 |
| 177 | 52 | 0 | 4 | 0 | 0 |
| 195 | 3 | 0 | 0 | 0 | 0 |
| 196 | 0 | 0 | 10 | 0 | 0 |
| 197 | 4 | 0 | 0 | 0 | 0 |
| 200 | 9 | 0 | 0 | 0 | 0 |
| 202 | 0 | 0 | 195 | 0 | 0 |
| 204 | 31 | 0 | 0 | 0 | 0 |
| 205 | 21 | 4 | 0 | 0 | 0 |
| 206 | 15 | 3 | 0 | 0 | 0 |
